# Supplementary material for: SS18-SSX, the Oncogenic Fusion Protein in Synovial Sarcoma, Is a Cellular Context-Dependent Epigenetic Modifier
Source: PubMed Central journal article supplement (PMC4646489; doi:10.1371/journal.pone.0142991), 2015-11-16
Supplement: pone.0142991.s001.pdf [file pone.0142991.s001.pdf]

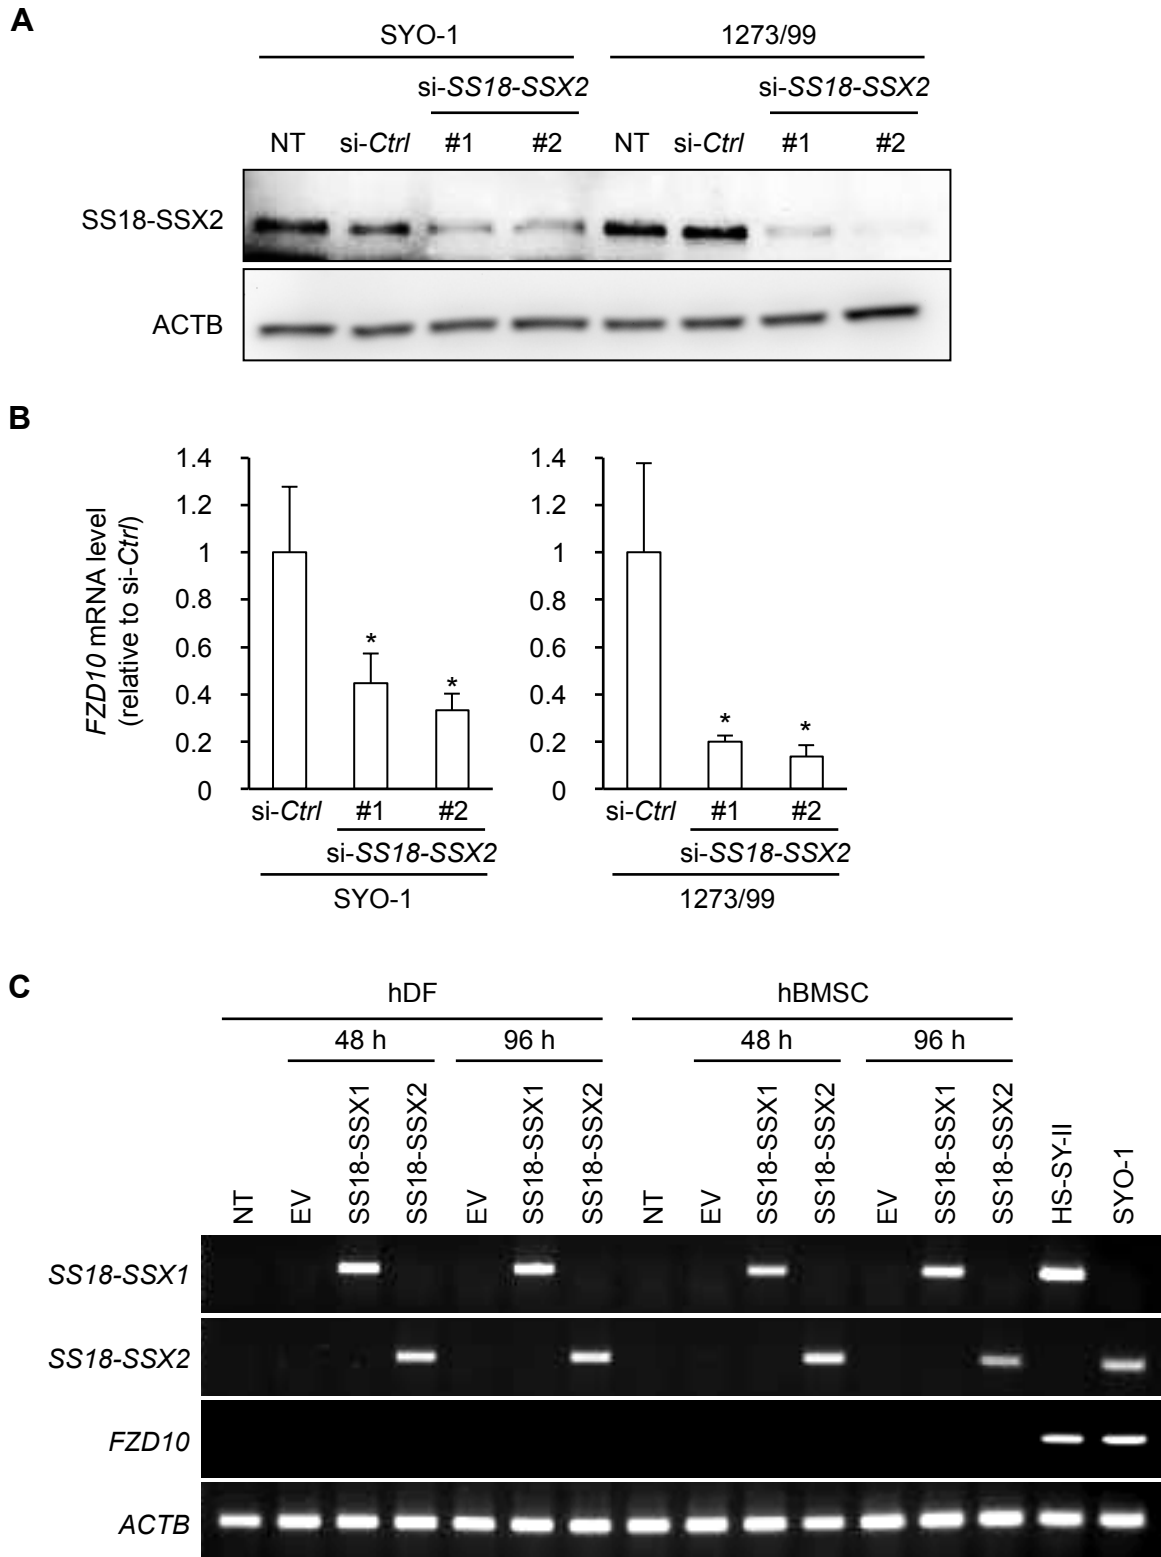

**S1 Fig. Direct regulation of the *FZD10* gene by the SS18-SSX2 fusion protein.**
