# Supplementary material for: SS18-SSX, the Oncogenic Fusion Protein in Synovial Sarcoma, Is a Cellular Context-Dependent Epigenetic Modifier
Source: PubMed Central journal article supplement (PMC4646489; doi:10.1371/journal.pone.0142991), 2015-11-16
Supplement: pone.0142991.s002.pdf [file pone.0142991.s002.pdf]

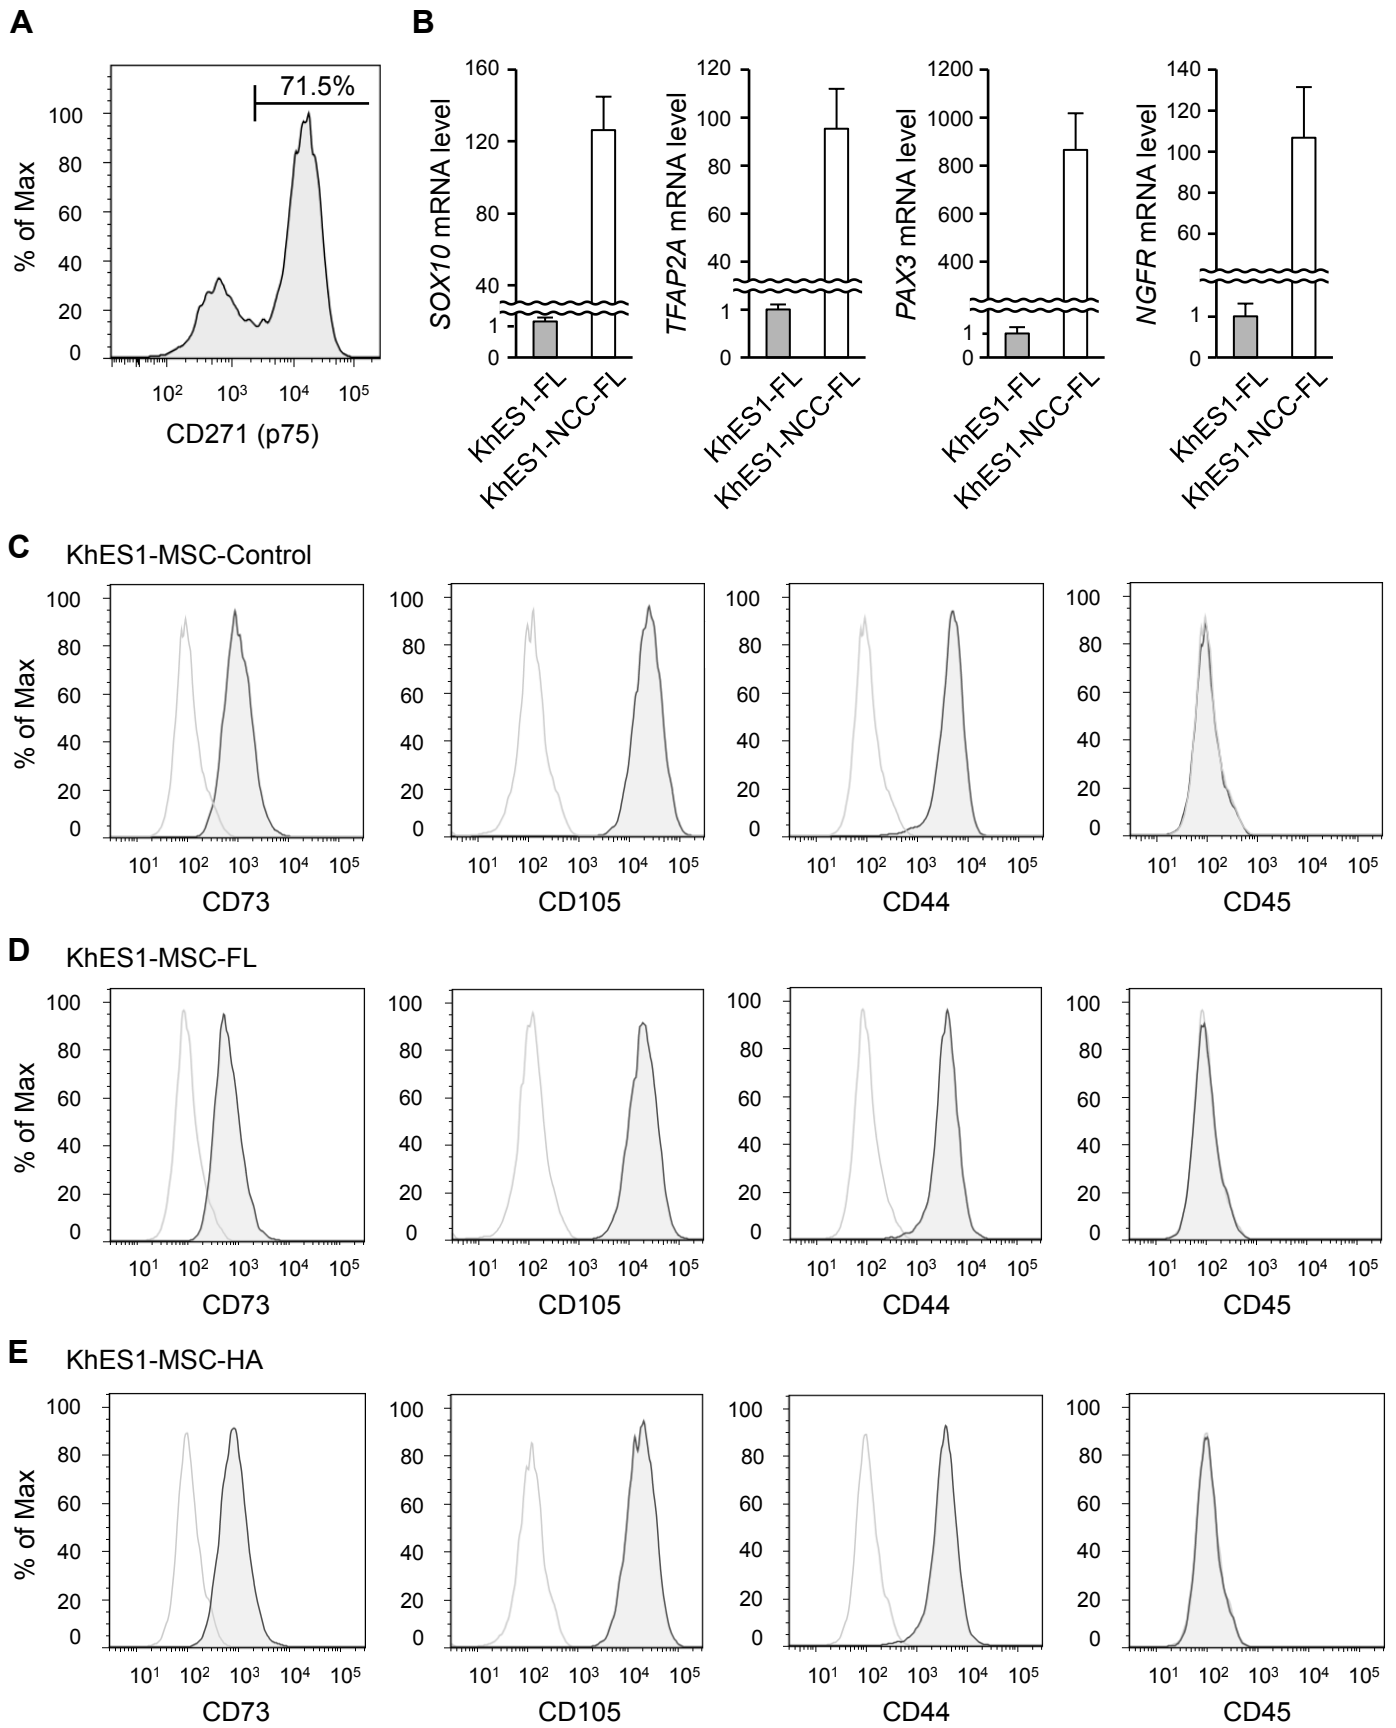

**S2 Fig. Characterization of KhES1-NCCs and KhES1-MSCs.**
