# Supplementary material for: SS18-SSX, the Oncogenic Fusion Protein in Synovial Sarcoma, Is a Cellular Context-Dependent Epigenetic Modifier
Source: PubMed Central journal article supplement (PMC4646489; doi:10.1371/journal.pone.0142991), 2015-11-16
Supplement: pone.0142991.s007.pdf [file pone.0142991.s007.pdf]

## S1 Table. Primer and siRNA sequences used in this study.

Primer sets for constructions in the Luc assay

| Name                                   | Sequence (5'→3')                 |
|----------------------------------------|----------------------------------|
| <i>FZD10</i> (-1305) KPN-Sense         | GTG GGTACC AAGCACCTGGCGCATCCTTG  |
| <i>FZD10</i> (-752) KPN-Sense          | CCG GGTACC TTCCCGCCTTCTTAGAGGAG  |
| <i>FZD10</i> (-335) Xho I-Sense        | CCG CTCGAG AGAGGCAAAGTTGGAGGCCA  |
| <i>FZD10</i> (-91) Xho I-Sense         | CCG CTCGAG TTTCTCATGCAAAGCAGCG   |
| <i>FZD10</i> (-39) Xho I-Sense         | CCG CTCGAG TGTCAGCGCTCGGCTTTTCT  |
| <i>FZD10</i> (+275) Hind III-Antisense | CCC AAGCTT AAGTTTGCAAACAATACCGGG |

Primer sets for qPCR

| Name             | Conventional PCR and/or qPCR | Forward (5'→3')        | Reverse (5'→3')        |
|------------------|------------------------------|------------------------|------------------------|
| <i>SS18-SSX1</i> | Conventional PCR             | CAACAGCAAGATGCATACCA   | GGTGCAGTTGTTTCCCATCG   |
| <i>SS18-SSX2</i> | Conventional PCR             | CAACAGCAAGATGCATACCA   | GGCACAGCTCTTTCCCATCA   |
| <i>SS18-SSX2</i> | qPCR; SYBR GREEN             | AGCAGAGGCCTTATGGATATGA | GGCACAGCTCTTTCCCATCA   |
| <i>FZD10</i>     | Both                         | TATCGGGCTCTTCTCTGTGC   | GACTGGGCAGGGATCTCATA   |
| <i>SOX10</i>     | qPCR; SYBR GREEN             | GAGCTGGACCGCACACCTTGGG | AACGCCACCTCCTCGGACCTC  |
| <i>TFAP2A</i>    | qPCR; SYBR GREEN             | AGGGCCTCGGTGAGATAGTT   | AAGAGTTCACCGACCTGCTG   |
| <i>PAX3</i>      | qPCR; SYBR GREEN             | CGGCATCCTGAGCGAGCGAG   | ACTCGGGCCTCGGTGAGCTT   |
| <i>NGFR</i>      | qPCR; SYBR GREEN             | CCGTTGGATTACACGGTCCA   | GACAGGGATGAGGTTGTCGG   |
| <i>ACTB</i>      | Conventional PCR             | AAGAGAGGCATCCTCACCT    | TACATGGCTGGGGTGTGAA    |
| <i>ACTB</i>      | qPCR; SYBR GREEN             | AGGTCTTTGCGGATGTCCACGT | CACCATTGGCAATGAGCGGTTT |

Primer sets for CHIP-qPCR

| Name                         | Forward (5'→3')        | Reverse (5'→3')         |
|------------------------------|------------------------|-------------------------|
| <i>FZD10</i> (-1206 to -955) | CTAAGTGACCCCGTCACAGACC | ATTTGGCGAGTGATGTGCC     |
| <i>FZD10</i> (-825 to -569)  | CAAACCAAGCCCGCACTTCC   | GCCCTTGCTTGTAACCTGCC    |
| <i>FZD10</i> (-93 to +47)    | GCTTTCTCATGCAAAGCAGCGG | CAGCCGGCAGCTGTTTCGAGG   |
| <i>FZD10</i> (+621 to +869)  | GCTACAACATGACTCGTATGCC | GCCAATTGAAGTTGAACTGCTCC |

siRNAs against *SS18-SSX2*

|                         | Sense (5'→3')           | Antisense (5'→3')        |
|-------------------------|-------------------------|--------------------------|
| si- <i>SS18-SSX2</i> #1 | UGACCAGAUCAUGCCCAAGdTdT | CUUGGGCAUGAUCUGGUCAAdTdT |
