# Supplementary material for: SS18-SSX, the Oncogenic Fusion Protein in Synovial Sarcoma, Is a Cellular Context-Dependent Epigenetic Modifier
Source: PubMed Central journal article supplement (PMC4646489; doi:10.1371/journal.pone.0142991), 2015-11-16
Supplement: pone.0142991.s008.pdf [file pone.0142991.s008.pdf]

## S2 Table. Antibodies used in this study.

### Antibodies for Western blotting

| Name                                                                    | Company    | Catalog No. |
|-------------------------------------------------------------------------|------------|-------------|
| SYT Antibody (H-80)                                                     | Santa Cruz | sc-28698    |
| Anti-HA tag antibody - CHIP Grade                                       | Abcam      | ab9110      |
| Monoclonal ANTI-FLAG M2-Peroxidase (HRP) antibody produced in the mouse | SIGMA      | A8592       |
| Ini1 (A5)                                                               | Santa Cruz | sc-166165   |
| Monoclonal Anti-b-Actin-Peroxidase clone AC-15                          | SIGMA      | A3854       |

### Antibodies for ChIP

| Name                              | Company   | Catalog No. |
|-----------------------------------|-----------|-------------|
| Anti-HA tag antibody - CHIP Grade | Abcam     | ab9110      |
| Anti-trimethyl-Histone H3 (Lys4)  | Millipore | 07-473      |
| ChIPAb+ Acetyl-Histone H3         | Millipore | 17-615      |
| Anti-trimethyl-Histone H3 (Lys27) | Millipore | 07-449      |

### Antibodies for FACS

| Name             | Company     | Catalog No. |
|------------------|-------------|-------------|
| p75(CD271)AF-647 | BD          | 560326      |
| CD73             | BD          | 550257      |
| CD105            | eBioscience | 17-1057-73  |
| CD44             | BD          | 555479      |
| CD45             | BD          | 340913      |
