# Supplementary material for: SS18-SSX, the Oncogenic Fusion Protein in Synovial Sarcoma, Is a Cellular Context-Dependent Epigenetic Modifier
Source: PubMed Central journal article supplement (PMC4646489; doi:10.1371/journal.pone.0142991), 2015-11-16
Supplement: pone.0142991.s009.pdf [file pone.0142991.s009.pdf]

**S3 Table. Cell lines and conditions for gene expression profiling.**

| Cell name described in Figure 3 | Cell type | Inducible gene | Concentration of DOX ( $\mu\text{g/ml}$ ) |
|---------------------------------|-----------|----------------|-------------------------------------------|
| hPSCs                           | KhES1     | FLAG-SS18-SSX2 | 0                                         |
|                                 | 414C2     | FLAG-SS18-SSX2 | 0                                         |
| hPSCs with SS18-SSX2            | KhES1     | FLAG-SS18-SSX2 | 0.03                                      |
|                                 | 414C2     | FLAG-SS18-SSX2 | 0.03                                      |
| hPSC-NCCs                       | KhES1-NCC | Stuffer        | 0.3                                       |
|                                 | 414C2-NCC | Stuffer        | 0.3                                       |
| hPSC-NCCs with SS18-SSX2        | KhES1-NCC | FLAG-SS18-SSX2 | 0.3                                       |
|                                 | 414C2-NCC | FLAG-SS18-SSX2 | 0.3                                       |
| hPSC-MSCs                       | KhES1-MSC | Stuffer        | 0.3                                       |
|                                 | 414C2-MSC | Stuffer        | 0.3                                       |
| hPSC-MSCs with SS18-SSX2        | KhES1-MSC | FLAG-SS18-SSX2 | 0.3                                       |
|                                 | 414C2-MSC | FLAG-SS18-SSX2 | 0.3                                       |
| SS cell lines                   | SYO-1     | None           | -                                         |
|                                 | 1273-99   | None           | -                                         |
|                                 | Fuji      | None           | -                                         |

N=1 for each sample.
